# Supplementary material for: Effect of Bovine Milk Fat-based Infant Formulae on Microbiota, Metabolites and Stool Parameters in Healthy Term Infants in A Randomized, Crossover, Placebo-controlled Trial
Source: Research Square preprint supplement (doi:10.21203/rs.3.rs-1280415/v1), 2022-02-08
Supplement: Supplementary file 1 [file 397b06064b64cf4f765c1e70.xlsx]

## Sheet: Peak Area Data
PARENT_SAMPLE_NAME	mevalonate	putrescine	spermidine	1-methyladenine	1-methylnicotinamide	12,13-DiHOME	5-hydroxyindoleacetate	alpha-ketoglutarate	kynurenate	3-hydroxyisobutyrate	cholate	gamma-aminobutyrate (GABA)	4-hydroxyphenylacetate	5,6-dihydrothymine	hypoxanthine	guanine	9,10-DiHOME	laurate (12:0)	quinolinate	N('1)-acetylspermidine	N6,N6,N6-trimethyllysine	N-acetylputrescine	N-formylmethionine	2'-deoxyadenosine	5-methylthioadenosine (MTA)	allantoic acid	arachidonate (20:4n6)	arginine	argininosuccinate	aspartate	3-(4-hydroxyphenyl)lactate (HPLA)	phenylpyruvate	beta-alanine	carnosine	biliverdin	succinate	3-hydroxybutyrate (BHBA)	cholesterol	creatinine	cysteinylglycine	cystine	sphingosine	desmosterol	cystathionine	homocysteine	sphinganine	fumarate	gamma-glutamylglutamate	gluconate
1 MF	12773292	6299849	6002287	7022857		927269	279200	49283582	5449038	4463733	355262964		841211	356355	1682878	16143362	7417023	273799657	759897	10445833	113170854	80410567	920837	323208	488221	1313418	51733684	483503655	564241	244788842	81467308	1389464	2918452	674525	11731467	2283958197	44607944	267222035	2621354	1158501	6074584	65297062	3842662	552003	996140	18244156	21324499	6029436	4113903
11 VF	4501039	9754004	154524798	2172042	8570702	162779	200729	35784916	1593938	4521678	278494387		1148624		5262524	9835686	826136	447097755	580151	283034563	52702450	119655855	6104895	814292	573542	596317	5065735	1018622582	544284	300379539	4853193	703283	76698683	138345	3302750	4939382174	10220840	217181268	32790591	698761	2227501	46573502	3679422	191777	235479	17041084	22109123	6269898	3996217
17 VF	4139009	33279945	11830732	4232807	5162981	333039	336541	22957418	6582317	8442003	702498128	19138932	10200751	3920974	4977235	23224604	2121853	995268577	375189	55584555	28782519	361675146	1831686	756470	696234	224589	32639121	800113627	1247200	564652305	249210267	796416	4367499	100757	6088154	1953661371	48420770	250159219	3353815	691848	1372489	93732302	2031041	403535	683470	36221468	64301526	9124606	16194732
21 MF	28836659	49797474	107007233	8359325	8084931	1364009	204004	35632710	4000591	7927742	152408512		5523730		5581852	7099652	7550075	558302870	1592249	299991351	89710073	355836000	1414232	324713	969796	1517375	98831087	715722131	1095621	264103678	1862733	889767	4611070	115079	4538666	2353873819	37063736	289420806	33677860	1182724	9109029	126676790	8437945	348687		24551130	36637716	7131442
7 VF	15716215	99810432	4382025	8165426	5121038	801391	373676	10338466	5554397	5135165	253974881	23793578	4968279	2716045	10460690	77341884	2304704	1103538650	406556	42652724	116578978	487057840	1873709	132457		944421	49887593	247810579		412909340	147974040	1217083	13290281	163130	10411838	2436146474	41139506	152865136	6455175	1247049	6026783	88738911	2141494	1189116	709430	35190092	22127372	4803826	29292243
15 Run-in	11426126	65568890	529930	12240073		2125887	191341	28658062	3770272	4347785	616190416	9214032	628749	1260214	2080118	37008775	5426840	908799275	442183	3327986	108737305	170336001	1366209	465465		716683	87874829	383756753	480813	404440428	168579780	2010985	7393965	415170	15463343	2976715072	11653365	111728796	44927511	833119	32355149	87277888	2442179	3574045	445209	29833746	41031153	4011536	9948117
1 VF	21862615	5929757	5192691	9908332		1215778	232299	46469337	5514532	5220814	331719928		1147018	718164	934972	18888548	4413436	877895519	421969	28127811	123001158	58339388	1534992	328794	494498	942737	51485694	612858976	416313	268726039	98803406	1676836	3585068	577961	20325922	2004600229	37781981	188283496	3686552	1013215	9789748	59865267	4333318	996365	729215	18411362	16781578	4895299	4521662
11 MF	4520301	7751265	177452832	4799027	7352249	277721	161969	54074924	1168301	5217071	374236782		2648187		5975952	5879364	689068	578731277	529080	311753465	51748451	93924661	7255071	428095		3200563	7352855	1235567756	1837178	324447395	2904044	842471	78097185	82486	4093723	4630346951	12610518	265317957	54369381	712313	6241159	44183407	3391188	713227	227470	19319276	30796441	9581901	3933554
21 Run-in	9924585	50811493	49643322	6547077	8974785	897002	212276	39466824	3099479	3167636	130025964	1023699	6776550	1125857	4071926	26498992	3488897	957036129	1183421	405918587	87028358	128498460	2592120	254809	713666	1509256	38505969	667216156	626763	263158968	968575	737672	19365933	89684	6660619	2051974911	31073175	178463090	66813755	880666	8837438	129105971	5358358		74025	24270210	27568817	4395805	2000566
15 VF	1099127	24077514	1101524	14829188		2178771	322203	4072762	3769326	2850575	325255331	19006448	648573	2690599	2664741	6109458	5004670	751676345	534666	12115974	116679962	117942553	1085633	793312		274173	63623591	403450366	548044	635654067	162799159	1578746	4638693	368792	21645944	3205378863	9691343	96083662	161904160	980775	21195326	79552147	1969054	1786310	196812	32606187	42597142	1850038	7714267
19 VF	5607817	10956158	35697632	2735081		442419	139353	25586018	4768791	4240879	349674327		250980	950785	7277444	18699692	2257574	807739823	498372	396069226	93893777	30564639	1350649	929728	1271207	100726	58756529	729188861	294561	232074113	27842838	871533	5468945	149167	7300437	6957568194	17941145	150457044	63296052	658901	2991348	54967488	1450145	1763282	479733	24604885	13901755	4734339	3664827
19 MF	4542535	16816563	24789950	3162027		194132	92148	30939817	4416123	3153704	386527580		230776	1530645	6599131	17637013	3.5326e+06	504096481	354886	313137043	77710730	27071701	625470	805734	1070842	529179	170849361	637691753	275876	218960824	49849132	691936	3256087	165654	5562423	6196541596	15967211	24934027	31590166	692856	3562724	60795497	330649	2545939	632935	22878319	9750705	3102928	7031095
19 Run-in	1114268	1661394	6485277	9333811		125869	244083	152078993	3235398	5013129	140049665		168984	2253213	4252756	9623946	964036	1776844757	260293	154439086	66120071	14342219	401522	3794090	1174669	280867	243260748	396374218	267990	65559672	53796855	3016119	6906644	233858	5220089	3710064419	9800727	7963580	104053599	624646	1687442	46720171		1019836	764553	19845244	11084019	2027185	5501420
4 MF	7403055	9020914	826279	7779623		1197324	318010	13989124	4630266	3220345	477831746	3919453	391774	602474	2089474	44523992	2020759	603545668	953817	12926355	67465879	85771489	785259	408396		307811	63875937	413013756	853515	558264391	96569351	902583	3247343	755495	10421218	3086719628	7668594	224194416	100532070	766532	5109929	36574899	2600266	1567060	633151	16158123	20478939	7391017	18340757
7 Run-in	6819923	37895672	1159355	7401084	6448475	563986	430477	4308968	4888532	3448419	455957980	18426219	325520	2210778	5829958	68658851	2736465	920503139	375907	53971400	86333675	374660030	2771098	734371	840948	749963	24982940	165327157		104395978	133351647	985455	2427714	389401	7081565	1616650426	19077965	92192429	1266062	534027	4327326	100539408	2359486	526412	416413	29432555	2912490	1858815	75827906
9 MF	38603585	83406858	55219379	2710180	8175327	943953	130935	34010339	5426561	7480427	277978394		3929937		3825121	72299420	3072737	922396758	627017	236048496	70840372	932483312	2371313	712943		1742721	87601191	747179988	646351	560287293	8452760	932505	84470447		6846370	1140852792	21142280	204775022	73147725	1360219	18988763	105479304	4877176		279339	26295790	19565562	18563100	4979430
17 Run-in	4644636	14796558	3925169	2533431	4931948	421562	201198	30574528	7449051	3688439	491179439	9805238	2004028	2349870	2688898	22206505	3001463	894830125	377310	21861001	72721927	116541329	2482341			247751	17997195	427534395	672605	439409899	255941508	992858	3648368	202288	9015560	3339379467	36437362	184257718	2503969	668441	6128953	56833451	2110636	451406	650012	17862836	18734609	5144678	20076846
17 MF	9726036	34084289	33735231	5853100	14303403	547724	312137	55303736	2589286	4852076	350343519		15267182	920522	6534404	13439171	3783755	432692551	869678	109734747	16360459	503076479	924727	488480	522664	113016	24969352	1112852135	4882715	684867794	219543479	714221	13996255	91104	3072041	1543458772	8027774	339801773	462528	1032135	4247501	91072445	3048256		539908	23913326	98759133	23422918	8651992
9 VF	11492983	29695547	10231313	2698012	4779040	1584242	133928	30512861	5434659	5807824	260350756	517022	3352242	439311	2889237	60933465	5231520	1051194687	373050	68117231	61460836	320448834	759034	456936		824680	43237481	728595966	610773	354162080	78086965	1248652	36197664		6661149	2296144797	34211457	190918781	3564956	771467	14003547	77291540	4075308		331138	24225694	56819866	4777390	10540363
11 Run-in	3189846	38302287	86493289	1659376	8057648	336728	117185	34323472	689989	4036869	490774380	2984662	2647690		4765976	9699306	1106081	544846826	655847	198002599	24693587	334428430	3135273	275301	662902	466643	6347984	857640437	739271	253694103	8543791	629170	85122400		6169151	5166522662	4726640	233732253	39460521	1092093	2829617	66145274	2925499	290195	221583	26736486	19907722	14736308	5398541
1 Run-in	14081853	1868057	1933897	9153138		1056791	184730	44409684	4567862	3061004	432490998		591982	424684	781431	32078573	5458273	1010896321	450027	3080721	109681828	30780080	1195400	357872	562740	321114	52940868	364402635	564360	153457144	81771476	1165453	2678428	350782	14819518	1356550366	7593557	137572103	3818264	775448	7186680	54753574	2667449	888789	876771	15244582	5606586	3154860	5976553
4 Run-in	6078444	12898138	660615	4218729		1807363	298162	18035788	4386423	3200901	495957708	2436544	376408	572931	1550708	36100381	1548878	592524238	738693	8999564	81977039	123813522	730352	381330	648170	866234	47623995	522383958	1201853	578595762	113167421	1228162	2689618	625978	19541974	3509050025	4768060	199924680	18660897	998481	9204282	54264855	2953609	1978399	367357	21027394	37796145	5730558	15891122
7 MF	10363470	31261217	5974210	5851079	6298698	907893	269050	29241846	6860814	5258060	466216578	1246269	6063898	522713	5725854	45651729	6342982	466843329	260561	87636160	93368588	346920142	1117875	246008	527556	1490816	55837297	440166384	1206211	523761953	149682136	868768	46135726	112657	10074753	2120887391	16529640	219518373	800672	1462080	5205733	114505424	3202039	2893371	950722	35585720	77466055	12512993	19532711
9 Run-in	14658578	78607444	42495156	2229719	6185473	1408042	155420	45185502	5498469	6426162	215560080	434639	3416150		3380576	47634755	4614507	987036112	623977	183486659	75464966	709639312	2362279	367350	2848193	756076	63795316	662788083	893871	378059865	15830187	1250315	49709869	52801	11304071	1721821329	19464546	175522101	92663221	1365759	19415759	105949411	4267282	742663	356549	27258217	25493690	12374325	4373754
21 VF	5682135	8572173	29407809	5521817	6134360	1019395	154026	13781454	2545527	3014908	226012425	807011	197897	952250	2212704	5893415	3117037	650103533	858510	333599427	83792736	29991235	3003972	433908	969975	419437	32656162	516283754	181916	175614133	3952173	509397	7139740	243653	5349888	2336804629	6099607	46302241	72978412	601369	6673972	124933523	1660139	861863	182017	23075461	5256080	1724370	1161391
4 VF	5715658	5222951	515307	8446174		1907511	246336	15319761	5120620	2864849	677961588	3349944	336854	637615	1748510	61522180	1989707	752737780	619147	7718417	74960730	59032558	737355	356263	955950	1522417	40233475	404726627	1970860	505116985	115415118	749839	2011388	480862	18491462	2280489240	6406179	204389880	33235021	859766	7583590	53844728	3813731	1930712	392743	21295062	27060374	4794208	16361361
18 VF	11006056	16904345	45190288	4044105	5054055	1260372	176626	18134307	4828296	5107148	314935340	2062920	1796787	904664	6941530	39520229	4344180	732848790	463306	124067642	110542642	178728285	1621491	128302	2239194	549428	39006079	928790891	952678	593652866	189824573	724627	50360129	170689	13939119	5234676857	24605050	251275505	2028719	988831	4625367	70785243	2767192		733975	78145397	46471915	4423255	11331558
13 MF	24347256	21814469	17069667	10030655	11361766	1099493	146767	30496569	5274286	7119803	295458553	596368	4080986		2101846	12769863	5688575	291789402	715932	78497427	97684068	265337162	1072458	240907		1813780	30324867	708951307	1674274	479201414	168646298	1242921	29513537		9150585	5215061371	33062303	281092565	714095	947738	5737606	102165085	3493921	275376	239380	25442805	65767888	6518276	5732429
13 VF	21009969	39175672	7332531	9115346	7850492	746286	225796	22759778	4872676	5508315	226585539	5974199	3534249	1358005	2541791	21108721	2604478	861746078	682659	41682982	106771778	345444179	760153		920179	480846	16126859	672762772	1020482	297227827	181353561	586148	18743300	98832	8257813	1824291950	30979898	175982963	762021	771191	4906007	85706028	2614961	155647	192367	30060268	79494621	5603423	3853423
16 Run-in	7549167	20936442	10398470	2953240	2193463	1533925	165593	33942515	3886345	4446630	310864398	10010879	1573138	1580229	2810733	66354680	7054142	933845301	321265	36932240	40940935	306322719	1663454	793511	1776782	332830	61081015	754804267	1011215	505976109	180112136	785737	20015268	485127	10700194	1772786343	11368539	139083477	142089581	1010175	4250107	45478946	3127982	417355	293536	16353508	39722934	7905727	6342780
8 VF	4762110	35741470	3580217	7543137	8656730	660146	214318	10721925	3711539	3918825	532067842	8945511	740159	1514857	2188618	39300541	2265015	1263181073	270021	9558443	82852954	189652095	964862	683592	3500622	322159	24860999	786667626	1393170	288831562	153897695	921735	3721286	151940	15000240	1907219952	3857942	77570743	122413497	701341	23121839	82826774	723747	751615	560479	34131205	14741904	5410659	28803408
10 Run-in	27564198	29775450	11446341	13370768	7393986	893560	178308	19232118	3831745	5130234	359354112		3367726		6175307	122578190	2071229	1455830010	348553	35442998	46058314	463359351	2901508	1340647	672422	589525	83366500	1156458258	3768758	940952982	62282252	831503	47430362	169952	9910925	883970831	10680138	243079715	81422189	1631899	7721385	99065708	5460520	1876213	568710	33814980	51123937	8570368	7627293
6 MF	18803153	19799008	209099288	8576653	6598081	1248338		14142540	4951201	6602436	376319602		1490680		6844093	51915897	7519403	367672542	434768	166876278	77430268	151522935	4956614	2216380		2442991	121262896	1751429417	1115828	758922240	23710467	1818598	11248288		2879163	4329900196	45987814	243166524	10338874	1896897	12876558	76833831	5417828	1073984	262968	30999913	23408020	132296	1171151
3 VF	9133217	9424043	74881123	1149633	6752251	435330	234601	9032063	8940272	5634642	154263749		1649892		5162002	28656675	1620808	861662343	857042	155264190	74527055	147252640	2283254	1025758	809689	467895	14220694	1233773879	1485739	422611673	8696307	571359	21222519		2863480	2212091631	11568629	246064926	5956522	747753	7078077	54666912	4570560	239427	108263	20402116	46763006		1977232
16 VF	7046208	20497911	19940459	2025639	3227271	1272009	245596	35593846	4330271	4955558	402888140	5585326	4987613	733709	2498832	63478470	5162864	1048630051	606355	27062026	13542643	585133623	1052224	1266607	1886744		41166859	810894896	2419384	694811761	108856933	373103	47352777	227134	11583415	1748662590	7558272	229331989	123418586	1030864	6671398	48740943	4704733	647851	420366	19066027	60434207	13911214	3729827
3 MF	5410354	11610707	165081059	3910323	6324247	950125	152327	16226023	9213394	5745181	147660651		1679272		8919696	8409620	4213261	318154083	1247471	373669554	97498941	261643480	3565041	566675	556889	629000	34907999	1027788123	1247527	398495061	10966980	691798	62940240		2973362	2170828500	9136186	281991866	4944272	1286130	4999658	90294933	4091274	487727	101337	26641112	37614662	2512328	4276951
6 VF	35765477	41674074	165081352	9056594	7262729	796365	63090	15598957	4086783	7893137	337574704		1925695		2043869	43975578	2513172	703623653	396810	375901875	75544741	222489216	8009547	1270924	423072	1261275	30184712	1360884953	1268261	570724621	14312517	1784160	13875042	108048	3150142	3359986206	53529563	199284506	20816661	1290720	15324070	79420379	5766997	695108	202575	30270509	20807537	741565	1465627
20 Run-in	28568091	20126782	1004917	15096045	6375273	1047890	284116	27767864	3199580	5636085	461547626	7550659	1643072	1287727	1729776	28220095	4530156	1119033468	548818	19774363	100244869	221910903	586449	623215	448646	418977	197295937	557176237	1017959	476652269	147322928	1556485	4676438	316638	9826126	1304354631	19511990	82738806	44171065	1273649	3810438	84534762	1462011	1132545	650522	31127065	70099395	5457985	20933544
3 Run-in	7837381	23419750	54041117	1327955	7014150	325928	138175	24345682	6569017	4400249	128516277	2031490	989325	6115316	4058444	7221169	1592466	617160937	674008	213066265	78050231	184783925	2578397	446689	656669	275519	9828921	712802833	314444	202225038	25323858	329063	20088571		2539474	3490007123	15187348	177268262	3569179	800582	1736522	66082316	4029578	158211	127846	24600160	16494414	439071	2470680
10 MF	38852731	15576612	33990699	5668780	3139716	631779		25340207	4841757	5128207	418968877		3261236		3432495	78350154	2795726	416449797	337272	109369473	52506282	294401775	1692482	1731874	1087115	3681862	110653617	1248388700	3961595	856696813	42622825	965188	32411528		2255138	2649601126	15906891	297406576	73772544	1392413	9669764	92237479	5227533	1661023	574517	24517661	47829262	9442320	9453208
20 MF	8664473	11639762	71624543	3315809	7577846	345406	296970	20628735	4517733	7450212	252065740	1515507	2660649	2253732	3298632	45745569	2374938	939449232	716892	50542642	92110409	475449855	851939	10023042	444809	870915	14336011	1174442066	3486516	724426762	14396886	935070	5806963	62459	1590917	3918034614	9322348	195408481	1873488	635846	5871005	81396595	2909103	305518	146231	114142280	48776674	9569169	3262947
18 MF	15267904	28112416	88087841	4889792	6303097	439978	176157	24737084	4976423	5509556	495698220	545512	3674641		12095123	43553556	5356884	367996632	518539	103935982	136258725	338637880	2332667	1190150	3439755	851988	86062736	1530388981	4382816	705630122	217961729	1032354	79586204	91820	8416488	5878835502	14014613	347717442	1010466	989995	15390772	115367877	4207405		692620	105380098	139237788	5976714	7559988
8 MF	5100045	48328646	5002545	6889794	6977808	741423	123534	12721008	3865735	3318511	385667176	4973946	812042	1379374	2712095	87009577	4025888	382356933	677551	22575159	68677773	402985396	2633090	376860	3349216	556654	29744851	943093782	1197539	460638780	162162139	1153043	5155627	117342	20925088	975887483	5071133	154423724	89195225	1182164	19943952	112507700	1198758	1239720	754704	35051974	13078384	8064307	39357262
16 MF	9886992	9611133	18336657	3786803	3254875	2305343	243850	39020931	4977985	5772125	362827422	1464881	4207143		6239232	81312148	13393031	614345689	511365	47921096	12478045	420347726	1348122	1623697	838864		81528108	1010962576	3687690	841146157	101607785	691739	60896416	269156	11609832	979528691	10094630	293338007	132430657	925164	9983947	61647878	4478009	884389	318296	22848426	112266902	12469411	6073332
8 Run-in	6838866	52394720	5541301	6167266	5866344	714943	166011	12549083	4076641	4160000	466093282	12964550	1221967	2860668	2560691	41497303	2585873	1192404415	312217	12249085	87426035	334201066	1074205	466836	3419980	335431	17210212	838488233	895644	303824449	145646163	743033	4267906	114257	11005778	1478193856	4577242	88531418	131189309	829782	28368204	107181754	1030168	911357	523786	34973293	13612999	5962815	22007271
6 Run-in	41571662	28664926	218887173	8908980	8496405	467865		6637023	4777112	14103148	261548242		2339723		4006475	31072171	1956505	754040514	729670	259650590	81824298	258820384	5595661	2950158		305078	38535546	1735921563	1224081	759888161	14514630	1122200	8913024	106916	5728793	5607910639	96387878	187619055	21112179	1763253	11904056	59327106	5371260	646735	142198	22816874	32453168		3667525
18 Run-in	12046337	12783212	17283788	3994758	3941667	862420	199207	21424405	4169362	4110088	485322318	2863510	1528792	1288995	4874027	39533874	3.92701e+06	917212363	310809	87552116	93141154	149118844	1264134	253499	1409102	313940	95290448	727698567	555944	411352156	190044923	762699	45010018	222522	8799158	4770745234	21100343	225781366	1966754	923629	4009196	77417307	3376933	370932	827018	65335026	24282415	3409183	13516184
20 VF	10203907	10949819	1107940	14513384	4300326	1771370	187770	9658322	3154530	4883686	196935945	3734472	510331	2798848	2362244	27157301	4150312	1233206204	368140	10032680	122239879	121761752	773707	728505	3254624	928288	307542456	666750966	673112	541300357	176906988	630240	8489079	116379	10261872	1209394040	19585528	35906996	9372920	1045587	6928351	115662733	522768	1207042	700209	31183497	43091402	2535693	14388191
13 Run-in	12951956	28725569	9877173	9840245	8546414	1061255	127615	30008543	4061160	6816376	241239623	4192578	3108381	526213	1479483	13088562	3143184	916952797	466252	36965931	103615002	247310712	1529364	209824	301211	2220634	21274351	826506005	1209477	395385925	222354424	884794	16754811	120736	10094195	2945052997	21655111	150188013	974694	1210239	11015698	86729975	2457616	510868	304272	27190769	49957779	6716013	7511935
10 VF	41581158	16192415	13228111	12408738	5054199	316146	81329	17453760	4120709	5150990	379343156		839996	898363	4262027	82015872	1.6134e+06	1038562333	242998	35111769	63353215	212632966	2943432	1972599	739808	1379283	53511056	1276676460	1933377	1135732785	71233836	962858	8637268	103628	11958913	2367202338	14315575	280449225	107346695	1539991	10631386	77644161	5073626	1675899	713037	25899759	34392152	8977282	13575554
[truncated: 821 more columns]

## Sheet: Batch-norm Imputed Data
SAMPLE	mevalonate	putrescine	spermidine	1-methyladenine	1-methylnicotinamide	12,13-DiHOME	5-hydroxyindoleacetate	alpha-ketoglutarate	kynurenate	3-hydroxyisobutyrate	cholate	gamma-aminobutyrate (GABA)	4-hydroxyphenylacetate	5,6-dihydrothymine	hypoxanthine	guanine	9,10-DiHOME	laurate (12:0)	quinolinate	N('1)-acetylspermidine	N6,N6,N6-trimethyllysine	N-acetylputrescine	N-formylmethionine	2'-deoxyadenosine	5-methylthioadenosine (MTA)	allantoic acid	arachidonate (20:4n6)	arginine	argininosuccinate	aspartate	3-(4-hydroxyphenyl)lactate (HPLA)	phenylpyruvate	beta-alanine	carnosine	biliverdin	succinate	3-hydroxybutyrate (BHBA)	cholesterol	creatinine	cysteinylglycine	cystine	sphingosine	desmosterol	cystathionine	homocysteine	sphinganine	fumarate	gamma-glutamylglutamate	gluconate
1 MF	1.28948	0.304088	0.39622	1.16849	0.340152	1.03573	1.40156	1.9683	1.19949	0.882137	1.00697	0.116386	0.505359	0.27972	0.463755	0.473559	2.36957	0.328021	1.47567	0.168887	1.38181	0.361884	0.600999	0.612627	0.582003	2.1438	1.13874	0.66334	0.553601	0.567941	0.833968	1.55044	0.237867	4.13489	1.31705	0.973829	2.86921	1.35408	0.0994777	1.17638	0.893169	0.821489	1.20007	0.68424	2.3697	0.710683	0.674297	1.06396	0.585101
11 VF	0.454385	0.470817	10.2004	0.361394	1.32911	0.181819	1.00764	1.42919	0.350871	0.893588	0.789376	0.116386	0.690037	0.27972	1.45021	0.288526	0.263932	0.535638	1.12661	4.57608	0.643492	0.538505	3.98446	1.54345	0.683713	0.973327	0.111505	1.39749	0.53402	0.696919	0.0496814	0.784761	6.25128	0.848066	0.370789	2.10604	0.657411	1.10051	1.24437	0.709544	0.327518	0.585931	1.14909	0.237719	0.560176	0.663819	0.699107	1.10639	0.568363
17 VF	0.417837	1.60639	0.780964	0.704273	0.800651	0.371994	1.6894	0.916879	1.44896	1.66833	1.99119	5.12494	6.12812	3.07776	1.37159	0.681284	0.677884	1.19237	0.72859	0.898686	0.351432	1.6277	1.19548	1.43386	0.829972	0.366581	0.718437	1.09771	1.22368	1.31007	2.55113	0.888684	0.35597	0.617649	0.683497	0.832997	3.11445	1.26761	0.127274	0.702524	0.201802	1.17923	0.634296	0.500205	1.62589	1.41097	2.03326	1.61013	2.3033
21 MF	2.91109	2.40368	7.0637	1.39086	1.25377	1.52355	1.02408	1.42311	0.880645	1.5667	0.431993	0.116386	3.31839	0.27972	1.53821	0.208265	2.41208	0.668866	3.09203	4.85023	1.09535	1.60142	0.923021	0.615479	1.15608	2.47671	2.17542	0.981931	1.07496	0.612754	0.0190685	0.99285	0.375822	0.705444	0.509541	1.00364	2.38396	1.46656	1.27804	1.20098	1.33933	1.59369	2.63518	0.432218	0.176097	0.956366	1.15851	1.25842	0.165179
7 VF	1.58657	4.81776	0.289264	1.3586	0.794147	0.895128	1.87582	0.4129	1.22268	1.01483	0.719877	6.37134	2.9847	2.13195	2.88268	2.26879	0.736301	1.32208	0.789503	0.689606	1.42342	2.19198	1.22291	0.251066	0.35907	1.54151	1.0981	0.339982	0.178485	0.958002	1.51479	1.35809	1.08322	1	1.1689	1.03872	2.64612	0.774603	0.244967	1.26629	0.88614	1.11641	0.668791	1.47398	1.68765	1.3708	0.699684	0.847686	4.1661
15 Run-in	1.15348	3.16495	0.0349814	2.03656	0.340152	2.37455	0.960513	1.14455	0.829945	0.859223	1.74656	2.46729	0.377722	0.989202	0.573223	1.08564	1.73375	1.08877	0.858688	0.0538066	1.32767	0.766588	0.891678	0.882268	0.35907	1.16979	1.93426	0.526493	0.471746	0.938353	1.72572	2.24396	0.60264	2.54503	1.73602	1.2692	0.749551	0.566155	1.70495	0.845975	4.7573	1.09802	0.762695	4.43024	1.0591	1.16214	1.29744	0.707878	1.41487
1 VF	2.20705	0.286224	0.342777	1.64859	0.340152	1.35798	1.16612	1.8559	1.21391	1.03175	0.940241	0.116386	0.689073	0.563721	0.257653	0.554087	1.40999	1.05175	0.819434	0.454768	1.50183	0.262553	1.00184	0.623215	0.589485	1.53876	1.13328	0.840809	0.408462	0.623479	1.01143	1.8711	0.292199	3.54295	2.28192	0.854717	2.43016	0.954076	0.139901	1.02885	1.43942	0.753152	1.3533	1.23505	1.73471	0.717197	0.530646	0.863827	0.643095
11 MF	0.456329	0.374147	11.7139	0.798483	1.14015	0.310205	0.813069	2.15966	0.257177	1.03101	1.06075	0.116386	1.5909	0.27972	1.64681	0.172469	0.220142	0.69334	1.02744	5.0404	0.631844	0.422703	4.73514	0.811435	0.35907	5.22406	0.161848	1.69513	1.80253	0.752759	0.0297282	0.940074	6.36526	0.505646	0.459589	1.97428	0.811116	1.34443	2.06326	0.723305	0.917661	0.555862	1.05907	0.884086	0.541124	0.752564	0.973807	1.69083	0.559451
21 Run-in	1.0019	2.45263	3.27703	1.08933	1.39177	1.00192	1.06561	1.57624	0.682284	0.625998	0.368551	0.274121	4.07102	0.883739	1.12211	0.777336	1.11462	1.14656	2.29812	6.56286	1.06261	0.578301	1.69179	0.482979	0.850753	2.46345	0.847575	0.915384	0.614943	0.610562	0.00991515	0.823134	1.57841	0.54977	0.747766	0.874916	1.99865	0.904313	2.53551	0.894256	1.2994	1.62426	1.67342	0.192934	0.176097	0.945423	0.871747	0.775686	0.284531
15 VF	0.110958	1.1622	0.0727132	2.46734	0.340152	2.43362	1.61743	0.162659	0.829737	0.563339	0.921917	5.08946	0.389631	2.11198	0.73433	0.179218	1.59888	0.900534	1.03828	0.19589	1.42465	0.530794	0.708555	1.50369	0.35907	0.447514	1.40045	0.553512	0.537709	1.4748	1.66655	1.76165	0.378074	2.26072	2.43012	1.3667	0.623353	0.486878	6.1441	0.99591	3.11643	1.00083	0.614938	2.21424	0.468192	1.27014	1.34695	0.326459	1.09716
19 VF	0.566115	0.528844	2.35645	0.455074	0.340152	0.494168	0.699539	1.02186	1.04975	0.838095	0.991131	0.116386	0.150777	0.746316	2.00546	0.548547	0.721244	0.9677	0.967803	6.40361	1.14643	0.137555	0.881522	1.76226	1.51539	0.164408	1.29332	1.00041	0.289006	0.538442	0.285023	0.972503	0.445743	0.914406	0.819596	2.96655	1.15399	0.7624	2.40202	0.669069	0.439829	0.691534	0.452882	2.18569	1.14123	0.95846	0.439584	0.835424	0.521231
19 MF	0.458574	0.811721	1.63642	0.526112	0.340152	0.216839	0.462574	1.23568	0.972115	0.623245	1.09559	0.116386	0.138639	1.20148	1.81854	0.517374	1.12859	0.603925	0.689163	5.06277	0.948841	0.121835	0.408223	1.52723	1.27654	0.863742	3.76066	0.874878	0.270674	0.508017	0.510298	0.772099	0.265385	1.01547	0.624475	2.64207	1.02702	0.126346	1.19881	0.703548	0.523841	0.764855	0.103262	3.15584	1.50568	0.891203	0.308325	0.547544	1
19 Run-in	0.112487	0.080194	0.428102	1.553	0.340152	0.140592	1.22527	6.07377	0.712204	0.99071	0.396963	0.116386	0.101517	1.76865	1.17194	0.282314	0.307988	2.12872	0.50547	2.49696	0.80732	0.0645464	0.26206	7.19153	1.40031	0.45844	5.35454	0.543803	0.262936	0.152107	0.55071	3.36555	0.562921	1.43357	0.586042	1.58189	0.630389	0.0403533	3.94873	0.634285	0.248111	0.587777	0.103262	1.26415	1.81878	0.773052	0.350485	0.357718	0.782441
4 MF	0.747346	0.435432	0.0545439	1.29441	0.340152	1.33737	1.59638	0.558701	1.01925	0.636414	1.35439	1.04953	0.235359	0.47291	0.575802	1.30609	0.645587	0.723068	1.85224	0.208992	0.823752	0.38601	0.512512	0.774097	0.35907	0.502419	1.40601	0.566632	0.837419	1.29524	0.988565	1.00715	0.264673	4.63125	1.16996	1.31611	0.493249	1.13604	3.81509	0.778361	0.751332	0.460141	0.812066	1.94246	1.50619	0.629424	0.647559	1.30422	2.60852
7 Run-in	0.688479	1.82919	0.0765307	1.23142	1	0.629954	2.16095	0.172093	1.07611	0.681487	1.29239	4.93409	0.195557	1.73534	1.60658	2.01408	0.874239	1.10279	0.729985	0.872605	1.05413	1.68614	1.8086	1.39197	1.00248	1.22411	0.549913	0.22682	0.178485	0.242212	1.3651	1.09962	0.197869	2.38706	0.795024	0.689303	1.22711	0.46716	0.0480458	0.542268	0.636263	1.26487	0.73687	0.652518	0.990596	1.14652	0.0920951	0.328007	10.7847
9 MF	3.89707	4.02598	3.64511	0.450931	1.26779	1.05437	0.657281	1.35831	1.19454	1.4783	0.787913	0.116386	2.36092	0.27972	1.0541	2.12087	0.98167	1.10506	1.21762	3.81641	0.864955	4.19659	1.54767	1.35135	0.35907	2.84452	1.92824	1.02509	0.634162	1.29994	0.0865296	1.04054	6.88471	0.323674	0.76862	0.486434	1.35988	1.03764	2.77588	1.38121	2.79199	1.32701	1.52315	0.192934	0.664514	1.02433	0.618678	3.27565	0.708201
17 Run-in	0.468881	0.714217	0.259106	0.421523	0.764824	0.470871	1.00999	1.22109	1.63975	0.728921	1.39222	2.6256	1.20392	1.84452	0.740987	0.651418	0.9589	1.07204	0.732709	0.353447	0.887928	0.524488	1.62014	0.243191	0.35907	0.404387	0.396146	0.586553	0.659921	1.01949	2.62003	1.10788	0.297358	1.24004	1.01215	1.42384	2.34367	0.933676	0.0950231	0.678756	0.901163	0.71501	0.659154	0.559544	1.5463	0.69583	0.592402	0.907832	2.85544
17 MF	0.981854	1.64522	2.22691	0.973864	2.21811	0.61179	1.5669	2.20874	0.569976	0.958882	0.993028	0.116386	9.17178	0.722561	1.8007	0.394232	1.20882	0.51838	1.68885	1.77418	0.19976	2.26407	0.603538	0.925892	0.623062	0.184468	0.549614	1.52677	4.79064	1.58898	2.24743	0.796966	1.14076	0.558475	0.344888	0.658096	0.516351	1.72185	0.0175525	1.04806	0.624526	1.14576	0.951973	0.192934	1.28438	0.931521	3.12284	4.13322	1.23053
9 VF	1.16023	1.43338	0.675384	0.448907	0.741112	1.76955	0.672306	1.21863	1.19632	1.14776	0.737949	0.138446	2.01386	0.344836	0.796195	1.78746	1.67135	1.25937	0.724436	1.10131	0.750431	1.44216	0.495395	0.866102	0.35907	1.34607	0.951723	0.999593	0.599255	0.821701	0.799364	1.39331	2.95027	0.323674	0.747825	0.979025	2.2005	0.967429	0.135286	0.783372	2.05899	0.972389	1.27272	0.192934	0.787737	0.943689	1.79669	0.843021	1.49911
11 Run-in	0.322018	1.84882	5.70955	0.276094	1.24954	0.376114	0.588257	1.37082	0.151886	0.797778	1.39107	0.799219	1.5906	0.27972	1.31337	0.284525	0.353368	0.652745	1.27361	3.20129	0.301507	1.50508	2.04629	0.521821	0.790238	0.761669	0.139729	1.17664	0.72533	0.588603	0.0874614	0.702062	6.93785	0.323674	0.69259	2.20289	0.30402	1.18437	1.49749	1.10895	0.416049	0.83216	0.913636	0.359714	0.527119	1.04149	0.629497	2.60038	0.767809
1 Run-in	1.42158	0.0901695	0.127659	1.52294	0.340152	1.1804	0.927327	1.77365	1.00552	0.604925	1.22587	0.116386	0.355634	0.333355	0.215341	0.941011	1.7438	1.21109	0.87392	0.0498088	1.33921	0.138524	0.780197	0.678331	0.670836	0.524132	1.16531	0.49994	0.553717	0.35604	0.837082	1.30047	0.218304	2.15032	1.66374	0.578403	0.488422	0.697109	0.144899	0.787414	1.05668	0.688843	0.833047	1.10171	2.08573	0.593838	0.177284	0.556708	0.850017
4 Run-in	0.613625	0.622582	0.0436081	0.70193	0.340152	2.01877	1.49674	0.720318	0.965577	0.632572	1.40576	0.652447	0.226128	0.449721	0.427333	1.05899	0.494832	0.709864	1.43449	0.145504	1.00093	0.557216	0.476676	0.722794	0.772676	1.41389	1.04828	0.716682	1.17919	1.34242	1.15848	1.37045	0.219216	3.8373	2.19391	1.49618	0.306684	1.01306	0.708162	1.01389	1.35334	0.682695	0.922415	2.45234	0.873898	0.819102	1.19514	1.01122	2.26012
7 MF	1.0462	1.50895	0.394366	0.973528	0.976773	1.01409	1.35061	1.16787	1.51026	1.03911	1.32146	0.33372	3.6429	0.410302	1.57789	1.33917	2.02644	0.559294	0.505991	1.41689	1.14002	1.5613	0.729599	0.466297	0.628893	2.43336	1.22906	0.603884	1.18346	1.21519	1.53227	0.969418	3.76026	0.690596	1.13106	0.904299	1.0632	1.11235	0.0303847	1.48464	0.765418	1.44057	1	3.5865	2.26165	1.38621	2.44953	2.20805	2.77805
9 Run-in	1.4798	3.79431	2.80517	0.37099	0.959215	1.57274	0.780193	1.80463	1.21037	1.26996	0.610992	0.116386	2.05226	0.27972	0.931594	1.39734	1.47423	1.1825	1.21172	2.9666	0.921421	3.1937	1.54178	0.696296	3.3953	1.23409	1.40423	0.909309	0.877014	0.877147	0.162051	1.39517	4.05157	0.323674	1.26907	0.734146	1.25197	0.889411	3.51647	1.38683	2.85477	1.33293	1.33268	0.920574	0.848187	1.06182	0.80613	2.18358	0.622059
21 VF	0.573618	0.413771	1.94125	0.918744	0.951288	1.13863	0.773196	0.550407	0.560343	0.595815	0.640619	0.216098	0.118887	0.747466	0.609761	0.172881	0.995823	0.778846	1.66717	5.39361	1.0231	0.134974	1.96059	0.822454	1.1563	0.684618	0.718812	0.708313	0.178485	0.407447	0.0404578	0.568412	0.58192	1.49361	0.600614	0.996361	0.39233	0.234624	2.76946	0.610649	0.981299	1.57176	0.518463	1.06833	0.432996	0.898882	0.166201	0.304283	0.165179
4 VF	0.577002	0.252107	0.0340162	1.40531	0.340152	2.13063	1.23658	0.611845	1.1272	0.56616	1.92164	0.897033	0.202366	0.500494	0.481841	1.80473	0.635667	0.901805	1.20234	0.124791	0.915264	0.265673	0.481246	0.675281	1.13958	2.48494	0.8856	0.555263	1.93369	1.17194	1.18149	0.83671	0.163937	2.94772	2.07598	0.972349	0.412049	1.03569	1.26123	0.873033	1.11504	0.677409	1.19103	2.39323	0.934288	0.829529	0.855669	0.845988	2.327
18 VF	1.11107	0.815958	2.98308	0.672876	0.78376	1.40779	0.886646	0.724253	1.06285	1.00929	0.892666	0.552399	1.07942	0.710114	1.9129	1.15931	1.38787	0.877978	0.899707	2.00592	1.34972	0.804358	1.05829	0.243191	2.66932	0.896793	0.858583	1.27425	0.934712	1.37735	1.9432	0.808578	4.10457	1.04634	1.5649	2.23195	1.58261	1.27327	0.0769878	1.00409	0.680085	0.890534	0.864197	0.192934	1.74604	3.04408	1.46948	0.78053	1.61163
13 MF	2.45788	1.05297	1.12679	1.66894	1.76193	1.2281	0.736756	1.21798	1.16102	1.40704	0.83746	0.159693	2.45166	0.27972	0.579211	0.374598	1.81737	0.349574	1.39029	1.26914	1.19271	1.19414	0.699957	0.456629	0.35907	2.96051	0.667497	0.972642	1.6427	1.11181	1.72641	1.38692	2.40548	0.323674	1.02731	2.22359	2.12659	1.42436	0.0270992	0.962363	0.843621	1.28532	1.09116	0.341345	0.569456	0.9911	2.07963	1.15022	0.815297
13 VF	2.12098	1.89098	0.484031	1.51665	1.21742	0.833577	1.13347	0.908986	1.07262	1.08857	0.642243	1.59974	2.12321	1.06596	0.700448	0.619215	0.832072	1.0324	1.32568	0.673927	1.30367	1.55465	0.496126	0.243191	1.09693	0.784852	0.354977	0.922993	1.00124	0.689606	1.85649	0.654055	1.52766	0.605848	0.927078	0.777837	1.99265	0.891746	0.0289179	0.783092	0.721348	1.07825	0.816655	0.192934	0.457618	1.17097	2.51368	0.988783	0.548054
16 Run-in	0.762097	1.01058	0.686418	0.491373	0.340152	1.71334	0.831261	1.35561	0.855496	0.878757	0.881127	2.68067	0.945065	1.2404	0.774561	1.94649	2.25364	1.11878	0.623874	0.597117	0.499885	1.37859	1.08568	1.50407	2.11808	0.543255	1.34449	1.03555	0.992145	1.17393	1.84378	0.876767	1.63133	2.97387	1.20128	0.755876	0.731231	0.704768	5.39215	1.02576	0.624909	0.572161	0.976872	0.517336	0.698287	0.637035	1.25607	1.39505	0.902104
8 VF	0.48074	1.72521	0.236335	1.25506	1.34245	0.737362	1.07586	0.428215	0.817016	0.77445	1.50811	2.39539	0.444652	1.18908	0.603123	1.15286	0.723621	1.51333	0.524361	0.15454	1.01163	0.85352	0.629732	1.29572	4.17305	0.525838	0.547229	1.07926	1.3669	0.670126	1.57543	1.02852	0.303301	0.931404	1.68403	0.813196	0.248145	0.393069	4.64547	0.712164	3.39969	1.04203	0.226027	0.931671	1.33331	1.32955	0.46615	0.954768	4.09658
10 Run-in	2.78264	1.43723	0.755589	2.22469	1.14663	0.998078	0.895089	0.768097	0.843477	1.01385	1.01857	0.116386	2.02317	0.27972	1.70175	3.59578	0.661711	1.74413	0.676865	0.573039	0.562368	2.08533	1.89371	2.54114	0.801586	0.962241	1.83502	1.5866	3.69769	2.18313	0.637574	0.927836	3.86578	1.04182	1.11267	0.376905	0.686953	1.23174	3.08989	1.65708	1.1353	1.24632	1.70533	2.32568	1.35289	1.31723	1.61658	1.51233	1.08479
6 MF	1.8982	0.955681	13.8029	1.42702	1.0232	1.39435	0.316706	0.564828	1.0899	1.30479	1.06666	0.116386	0.895528	0.27972	1.88604	1.52293	2.40228	0.440484	0.844288	2.69804	0.945417	0.681921	3.23501	4.20105	0.35907	3.98752	2.66918	2.40286	1.09479	1.7608	0.24272	2.02929	0.916784	0.323674	0.323234	1.84617	2.95796	1.23218	0.39235	1.92617	1.89329	0.96663	1.69199	1.33127	0.625569	1.20757	0.740179	0.023345	0.166567
3 VF	0.922008	0.45489	4.94301	0.191281	1.04711	0.48625	1.17767	0.360725	1.96801	1.11354	0.437252	0.116386	0.991175	0.27972	1.42251	0.840631	0.517812	1.0323	1.66431	2.5103	0.909969	0.662703	1.4902	1.94428	0.965221	0.763713	0.313019	1.69267	1.45772	0.980513	0.0890227	0.637553	1.72973	0.323674	0.321474	0.943186	0.744101	1.24687	0.226044	0.759292	1.04072	0.687753	1.42739	0.296784	0.257545	0.794745	1.47868	0.023345	0.281213
16 VF	0.711322	0.989416	1.3163	0.337034	0.50047	1.42079	1.23287	1.42156	0.953217	0.979332	1.14196	1.49561	2.99632	0.575923	0.68861	1.86211	1.64942	1.25629	1.1775	0.437537	0.165354	2.63336	0.68675	2.4008	2.24917	0.164408	0.906146	1.1125	2.37376	1.61205	1.11435	0.416328	3.85946	1.39235	1.30043	0.74559	0.486153	1.16208	4.68361	1.04677	0.98092	0.6132	1.46929	0.803049	1	0.742699	1.91097	2.45478	0.530476
3 MF	0.546181	0.560439	10.8972	0.650616	0.980735	1.06126	0.764667	0.648039	2.02813	1.13538	0.418535	0.116386	1.00883	0.27972	2.45802	0.246693	1.34604	0.381159	2.4225	6.04146	1.19045	1.17751	2.32678	1.07411	0.663861	1.02667	0.768378	1.41007	1.224	0.924559	0.112267	0.771945	5.1299	0.323674	0.33381	0.925593	0.587645	1.42892	0.18763	1.30598	0.735118	1.13598	1.27771	0.604566	0.241068	1.03778	1.1894	0.443327	0.608291
6 VF	3.61056	2.01157	10.8973	1.50687	1.12627	0.889514	0.316706	0.622995	0.899618	1.55987	0.956836	0.116386	1.15686	0.27972	0.563234	1.29	0.802902	0.842965	0.770577	6.07755	0.922395	1.0013	5.22756	2.40898	0.504339	2.05869	0.664412	1.86706	1.24434	1.32415	0.146515	1.99086	1.13088	0.662343	0.353656	1.43262	3.44305	1.00982	0.789971	1.31064	2.25315	0.999171	1.80104	0.861627	0.481901	1.17916	0.65795	0.130857	0.208449
20 Run-in	2.88398	0.971502	0.066336	2.51174	0.988648	1.17046	1.42624	1.109	0.704319	1.11382	1.30823	2.02188	0.987078	1.0108	0.476679	0.827824	1.44728	1.34064	1.06577	0.31971	1.22398	0.998699	0.382755	1.18128	0.534826	0.683867	4.34279	0.764415	0.998762	1.10589	1.50812	1.73681	0.38115	1.94102	1.10315	0.556148	1.25502	0.419257	1.67625	1.2933	0.560263	1.06351	0.456588	1.40386	1.54751	1.21252	2.2166	0.963119	2.97728
3 Run-in	0.791192	1.13045	3.56733	0.220951	1.08772	0.364051	0.693625	0.972324	1.44603	0.869591	0.364272	0.543983	0.594338	4.8002	1.1184	0.21183	0.508757	0.73938	1.30888	3.44484	0.952986	0.831611	1.68283	0.846679	0.782807	0.449711	0.21635	0.977926	0.308514	0.469188	0.259236	0.367186	1.63731	0.323674	0.285098	1.48806	0.976859	0.898259	0.135447	0.812936	0.255327	0.831368	1.25844	0.196112	0.30413	0.958275	0.521566	0.0774787	0.351393
10 MF	3.92222	0.751869	2.24378	0.943196	0.486893	0.705677	0.316706	1.01204	1.06581	1.01345	1.18754	0.116386	1.95919	0.27972	0.945902	2.29837	0.893172	0.498921	0.654958	1.76828	0.641097	1.32494	1.10462	3.28269	1.29594	6.00965	2.43566	1.71272	3.88689	1.98765	0.436323	1.07701	2.64168	0.323674	0.253177	1.12973	1.02314	1.50703	2.79959	1.4139	1.42178	1.16042	1.63256	2.05893	1.36671	0.955062	1.5124	1.6662	1.34449
20 MF	0.874688	0.561841	4.72804	0.551699	1.17514	0.385807	1.49076	0.823876	0.994483	1.47233	0.714465	0.405816	1.59839	1.76906	0.909013	1.34193	0.758739	1.12549	1.39215	0.817169	1.12466	2.13974	0.556031	18.9982	0.530252	1.42153	0.315558	1.61127	3.42077	1.68076	0.147379	1.0434	0.473293	0.382879	0.178607	1.67056	0.599619	0.99018	0.071097	0.645658	0.863236	1.02403	0.908516	0.378707	0.347866	4.4463	1.54235	1.68858	0.464074
18 MF	1.54131	1.35696	5.81481	0.813585	0.977455	0.491441	0.884291	0.987956	1.09545	1.08882	1.40503	0.146075	2.20755	0.27972	3.33308	1.27762	1.7114	0.440872	1.00697	1.68043	1.66371	1.52402	1.52245	2.25588	4.10049	1.39064	1.89437	2.09961	4.30016	1.63715	2.23124	1.15196	6.48662	0.562864	0.944892	2.5066	0.901428	1.76196	0.0383461	1.00527	2.26296	1.45142	1.31398	0.192934	1.64766	4.10498	4.4028	1.05465	1.07522
8 MF	0.514855	2.33278	0.330225	1.14635	1.08209	0.828146	0.620129	0.508055	0.850959	0.655814	1.09315	1.3319	0.487835	1.08274	0.747379	2.55239	1.28618	0.458076	1.31576	0.364993	0.83855	1.81362	1.71853	0.714322	3.99256	0.908588	0.65473	1.29387	1.17496	1.06874	1.66003	1.28663	0.420206	0.719316	2.34919	0.416097	0.326178	0.7825	3.38487	1.20041	2.93243	1.41544	0.374373	1.53671	1.79535	1.36542	0.413548	1.42303	5.5976
16 MF	0.998102	0.463921	1.21043	0.630065	0.504751	2.57499	1.2241	1.55843	1.0958	1.1407	1.02841	0.392259	2.52745	0.27972	1.71936	2.38526	4.27877	0.736007	0.993034	0.774784	0.152356	1.89175	0.879873	3.07765	1	0.164408	1.79456	1.38698	3.61815	1.95157	1.04014	0.771879	4.96332	1.64995	1.3034	0.417649	0.649293	1.48641	5.02561	0.939441	1.46798	0.775579	1.39849	1.09625	0.757188	0.890038	3.54996	2.20036	0.863782
8 Run-in	0.690391	2.52905	0.365789	1.02614	0.909726	0.798568	0.833359	0.501189	0.897386	0.822112	1.32111	3.47159	0.734098	2.24547	0.705656	1.21731	0.826128	1.42854	0.606303	0.198042	1.06746	1.50405	0.701097	0.884867	4.07692	0.547501	0.378823	1.15036	0.878754	0.704911	1.49096	0.829116	0.347853	0.700405	1.23558	0.630269	0.294411	0.448609	4.9785	0.842587	4.17108	1.34843	0.321723	1.12968	1.24602	1.36235	0.430453	1.0522	3.12999
6 Run-in	4.1967	1.38363	14.4491	1.48231	1.31758	0.52259	0.316706	0.265071	1.05158	2.78711	0.741343	0.116386	1.40559	0.27972	1.10407	0.911489	0.625059	0.903366	1.41697	4.19801	0.999068	1.16481	3.6521	5.5919	0.35907	0.497958	0.848226	2.38159	1.201	1.76304	0.148584	1.25221	0.72645	0.655404	0.643153	2.39109	6.19973	0.950709	0.801186	1.79046	1.7503	0.746382	1.67745	0.801666	0.338272	0.888809	1.02619	0.023345	0.521615
18 Run-in	1.21609	0.617034	1.14093	0.664665	0.611256	0.963295	1	0.855654	0.917796	0.812248	1.37562	0.766778	0.918424	1.01179	1.34315	1.15971	1.25459	1.09885	0.603569	1.41554	1.13725	0.671102	0.825057	0.480496	1.67977	0.512422	2.09749	0.998362	0.54546	0.954389	1.94546	0.85106	3.66851	1.36408	0.987853	2.03414	1.35719	1.14409	0.0746363	0.937882	0.589487	0.973971	1.05462	0.459792	1.96738	2.54506	0.767828	0.601586	1.92234
20 VF	1.0301	0.528538	0.0731367	2.4148	0.666875	1.97856	0.942587	0.385737	0.694403	0.965129	0.558203	1	0.306582	2.19695	0.65097	0.796648	1.32593	1.47742	0.714902	0.162208	1.49254	0.547983	0.504972	1.38085	3.8798	1.51518	6.76948	0.914745	0.660418	1.25589	1.81097	0.703256	0.691897	0.713413	1.15207	0.515658	1.25975	0.181949	0.355693	1.06172	1.0187	1.45513	0.163261	1.4962	1.66571	1.21472	1.36258	0.44745	2.04637
13 Run-in	1.30751	1.38656	0.652006	1.63726	1.32534	1.18539	0.640615	1.19849	0.893978	1.34707	0.683779	1.12267	1.86736	0.41305	0.407705	0.383947	1.00418	1.09854	0.905428	0.597662	1.26513	1.11301	0.998163	0.397712	0.35907	3.62459	0.468281	1.13392	1.18667	0.917346	2.27621	0.9873	1.36559	0.740121	1.13324	1.2557	1.39287	0.761037	0.0369886	1.22891	1.61968	1.09113	0.767516	0.633251	0.723826	1.05919	1.5797	1.18511	1.06839
10 VF	4.19766	0.781594	0.873207	2.06462	0.783782	0.353125	0.408264	0.697073	0.907086	1.01795	1.07523	0.116386	0.504629	0.705168	1.1745	2.4059	0.515445	1.24423	0.471885	0.567684	0.773537	0.956944	1.92108	3.73897	0.881916	2.25131	1.17786	1.75153	1.89692	2.63504	0.72921	1.07441	0.703975	0.635248	1.34259	1.00932	0.920786	1.4211	4.0737	1.56376	1.56317	0.976825	1.5845	2.07737	1.69623	1.0089	1.08751	1.58414	1.93079
[truncated: 821 more columns]
